# Supplementary material for: Key drivers of innovativeness appraisal for medicines: the Italian experience after the adoption of the new ranking system
Source: PubMed Central journal article supplement — BMJ Open. 2021 Jan 13;11(1):e041259. doi: 10.1136/bmjopen-2020-041259 (PMC7812109; doi:10.1136/bmjopen-2020-041259), 2021-01-13
Supplement: bmjopen-2020-041259supp001.pdf [file bmjopen-2020-041259supp001.pdf]

Supplementary Table 1 – Description of medicine innovative appraisal, ordered by date of publication on AIFA's website – Last access 31 July 2020

| ID | Medicine                     | Disease Group | Population | Rare disease* | CTS date      | Innovation status        | Unmet need | Added value | Quality of evidence | Notes                                                                                                                                                    |
|----|------------------------------|---------------|------------|---------------|---------------|--------------------------|------------|-------------|---------------------|----------------------------------------------------------------------------------------------------------------------------------------------------------|
| 1  | daratumumab                  | H             | Adult      | Yes           | July 2017     | Not innovative           | Important  | Moderate    | Low                 | <i>Although multiple myeloma is a rare disease (prevalence does not exceed 5 / 10,000) AIFA evaluated this medicine in a setting of non-rare disease</i> |
| 2  | glecaprevir and pibrentasvir | Non-Onco      | Adult      | No            | July 2017     | Fully innovative         | Important  | Important   | Moderate            |                                                                                                                                                          |
| 3  | obeticholic acid             | Non-Onco      | Adult      | Yes           | May 2017      | Not innovative           | Maximum    | Poor        | Low                 |                                                                                                                                                          |
| 4  | baricitinib                  | Non-Onco      | Adult      | No            | June 2017     | Not innovative           | Moderate   | Poor        | High                |                                                                                                                                                          |
| 5  | nusinersen                   | Non-Onco      | Pediatric  | Yes           | July 2017     | Fully innovative         | Maximum    | Important   | Low                 |                                                                                                                                                          |
| 6  | palbociclib                  | S             | Adult      | No            | June 2017     | Not innovative           | Important  | Poor        | Moderate            |                                                                                                                                                          |
| 7  | palbociclib                  | S             | Adult      | No            | June 2017     | Conditionally innovative | Moderate   | Moderate    | Moderate            |                                                                                                                                                          |
| 8  | cenegermin                   | Non-Onco      | Adult      | Yes           | November 2017 | Fully innovative         | Important  | Important   | Low                 |                                                                                                                                                          |
| 9  | ceftazidime / avibactam      | Non-Onco      | Adult      | No            | July 2017     | Not innovative           | Important  | Poor        | Low                 |                                                                                                                                                          |

| ID | Medicine                                    | Disease Group | Population | Rare disease* | CTS date       | Innovation status        | Unmet need | Added value | Quality of evidence | Notes                                                                               |
|----|---------------------------------------------|---------------|------------|---------------|----------------|--------------------------|------------|-------------|---------------------|-------------------------------------------------------------------------------------|
| 10 | nivolumab                                   | S             | Adult      | No            | September 2017 | Not innovative           | Important  | N/A         | Low                 | <i>The added therapeutic value in this indication was considered not assessable</i> |
| 11 | allogeneic t cells genetically modified     | H             | Adult      | Yes           | September 2017 | Not innovative           | Moderate   | Moderate    | Very low            |                                                                                     |
| 12 | daratumumab                                 | H             | Adult      | Yes           | October 2017   | Fully innovative         | Moderate   | Important   | Moderate            |                                                                                     |
| 13 | sofosbuvir/<br>velpatasvir/<br>voxilaprevir | Non-Onco      | Adult      | No            | July 2017      | Fully innovative         | Important  | Important   | Moderate            |                                                                                     |
| 14 | adalimumab                                  | Non-Onco      | Adult      | Yes           | November 2017  | Conditionally innovative | Important  | Moderate    | Moderate            |                                                                                     |
| 15 | lenalidomide                                | H             | Adult      | Yes           | September 2017 | Conditionally innovative | Moderate   | Moderate    | Moderate            |                                                                                     |
| 16 | inotuzumab<br>ozagamicin                    | H             | Adult      | Yes           | October 2017   | Conditionally innovative | Moderate   | Moderate    | Moderate            |                                                                                     |
| 17 | atezolizumab                                | S             | Adult      | No            | November 2017  | Fully innovative         | Important  | Moderate    | High                |                                                                                     |
| 18 | bezlotoxumab                                | Non-Onco      | Adult      | No            | October 2017   | Not innovative           | Important  | Moderate    | Low                 |                                                                                     |
| 19 | dinutuximab beta                            | S             | Mixed      | Yes           | February 2018  | Fully innovative         | Maximum    | Important   | Moderate            |                                                                                     |
| 20 | dinutuximab beta                            | S             | Mixed      | Yes           | February 2018  | Not innovative           | Maximum    | Important   | Very low            |                                                                                     |

| ID | Medicine    | Disease Group | Population | Rare disease* | CTS date      | Innovation status        | Unmet need | Added value | Quality of evidence | Notes |
|----|-------------|---------------|------------|---------------|---------------|--------------------------|------------|-------------|---------------------|-------|
| 21 | alectinib   | S             | Adult      | No            | January 2018  | Conditionally innovative | Moderate   | Moderate    | Moderate            |       |
| 22 | alectinib   | S             | Adult      | No            | January 2018  | Fully innovative         | Moderate   | Important   | Moderate            |       |
| 23 | nivolumab   | S             | Adult      | No            | November 2017 | Conditionally innovative | Important  | Moderate    | Moderate            |       |
| 24 | midostaurin | H             | Adult      | Yes           | December 2017 | Fully innovative         | Moderate   | Important   | Moderate            |       |
| 25 | midostaurin | H             | Adult      | Yes           | December 2017 | Not innovative           | Important  | Poor        | Low                 |       |
| 26 | ibrutinib   | H             | Adult      | Yes           | October 2017  | Conditionally innovative | Moderate   | Moderate    | Moderate            |       |
| 27 | dupilumab   | Non-Onco      | Adult      | No            | January 2018  | Fully innovative         | Important  | Moderate    | High                |       |
| 28 | ocrelizumab | Non-Onco      | Adult      | No            | February 2018 | Not innovative           | Maximum    | Poor        | Moderate            |       |
| 29 | letermovir  | Non-Onco      | Adult      | Yes           | February 2018 | Fully innovative         | Moderate   | Important   | High                |       |
| 30 | avelumab    | S             | Adult      | Yes           | January 2018  | Conditionally innovative | Important  | Moderate    | Low                 |       |
| 31 | canakinumab | Non-Onco      | Mixed      | Yes           | December 2017 | Conditionally innovative | Important  | Moderate    | Moderate            |       |
| 32 | ibrutinib   | H             | Adult      | Yes           | July 2017     | Not innovative           | Poor       | Poor        | Moderate            |       |
| 33 | ribociclib  | S             | Adult      | No            | November 2017 | Conditionally innovative | Moderate   | Moderate    | Moderate            |       |
| 34 | nivolumab   | H             | Adult      | Yes           | July 2017     | Conditionally innovative | Maximum    | Moderate    | Low                 |       |

| ID | Medicine                                          | Disease Group | Population | Rare disease* | CTS date      | Innovation status        | Unmet need | Added value | Quality of evidence | Notes |
|----|---------------------------------------------------|---------------|------------|---------------|---------------|--------------------------|------------|-------------|---------------------|-------|
| 35 | niraparib                                         | S             | Adult      | Yes           | January 2018  | Conditionally innovative | Important  | Moderate    | Moderate            |       |
| 36 | regorafenib                                       | S             | Adult      | No            | February 2018 | Conditionally innovative | Maximum    | Moderate    | High                |       |
| 37 | emicizumab                                        | Non-Onco      | Mixed      | Yes           | June 2018     | Fully innovative         | Moderate   | Important   | Low                 |       |
| 38 | ethyl telotristat                                 | S             | Adult      | Yes           | January 2018  | Not innovative           | Important  | Poor        | Moderate            |       |
| 39 | liposomal daunorubicin hydrochloride / cytarabine | H             | Adult      | Yes           | November 2018 | Fully innovative         | Moderate   | Important   | Moderate            |       |
| 40 | pembrolizumab                                     | S             | Adult      | No            | May 2019      | Fully innovative         | Moderate   | Important   | High                |       |
| 41 | tocilizumab                                       | Non-Onco      | Adult      | Yes           | July 2018     | Conditionally innovative | Moderate   | Moderate    | Moderate            |       |
| 42 | daratumumab                                       | H             | Adult      | Yes           | October 2017  | Fully innovative         | Moderate   | Important   | Moderate            |       |
| 43 | cladribine                                        | Non-Onco      | Adult      | No            | April 2018    | Not innovative           | Moderate   | Poor        | Very low            |       |
| 44 | lutetium oxodotreotide                            | S             | Adult      | Yes           | March 2018    | Fully innovative         | Important  | Important   | Low                 |       |
| 45 | darvadstrocel                                     | Non-Onco      | Adult      | Yes           | April 2019    | Not innovative           | Moderate   | Poor        | Low                 |       |
| 46 | cysteamine                                        | Non-Onco      | Mixed      | Yes           | January 2018  | Not innovative           | Poor       | Moderate    | Very low            |       |
| 47 | obinutuzumab                                      | H             | Adult      | Yes           | March 2018    | Not innovative           | Poor       | Poor        | Moderate            |       |

| ID | Medicine            | Disease Group | Population | Rare disease* | CTS date      | Innovation status        | Unmet need | Added value | Quality of evidence | Notes |
|----|---------------------|---------------|------------|---------------|---------------|--------------------------|------------|-------------|---------------------|-------|
| 48 | pembrolizumab       | S             | Adult      | No            | June 2018     | Conditionally innovative | Important  | Moderate    | High                |       |
| 49 | pembrolizumab       | H             | Adult      | Yes           | November 2017 | Conditionally innovative | Maximum    | Moderate    | Low                 |       |
| 50 | pertuzumab          | S             | Adult      | No            | November 2018 | Not innovative           | Moderate   | Poor        | Moderate            |       |
| 51 | tisagenlecleucel    | H             | Mixed      | Yes           | January 2019  | Fully innovative         | Important  | Important   | Moderate            |       |
| 52 | tisagenlecleucel    | H             | Adult      | Yes           | January 2019  | Fully innovative         | Important  | Important   | Low                 |       |
| 53 | burosumab           | Non-Onco      | Pediatric  | Yes           | December 2018 | Conditionally innovative | Important  | Moderate    | Low                 |       |
| 54 | durvalumab          | S             | Adult      | No            | March 2019    | Fully innovative         | Important  | Important   | Moderate            |       |
| 55 | lenvatinib          | S             | Adult      | Yes           | April 2019    | Not innovative           | Important  | Absent      | Moderate            |       |
| 56 | brentuximab vedotin | H             | Adult      | Yes           | April 2018    | Conditionally innovative | Moderate   | Moderate    | Moderate            |       |
| 57 | pembrolizumab       | S             | Adult      | No            | May 2019      | Fully innovative         | Important  | Moderate    | High                |       |
| 58 | pembrolizumab       | S             | Adult      | No            | May 2019      | Fully innovative         | Moderate   | Important   | Moderate            |       |
| 59 | nivolumab           | S             | Adult      | No            | April 2019    | Fully innovative         | Important  | Moderate    | High                |       |
| 60 | osimertinib         | S             | Adult      | No            | February 2019 | Fully innovative         | Moderate   | Important   | Moderate            |       |

| ID | Medicine                                              | Disease Group | Population | Rare disease* | CTS date      | Innovation status        | Unmet need | Added value | Quality of evidence | Notes              |
|----|-------------------------------------------------------|---------------|------------|---------------|---------------|--------------------------|------------|-------------|---------------------|--------------------|
| 61 | acicabtagene ciloleucel                               | H             | Adult      | Yes           | January 2019  | Fully innovative         | Important  | Important   | Moderate            |                    |
| 62 | dabrafenib                                            | S             | Adult      | No            | April 2019    | Fully innovative         | Important  | Important   | High                |                    |
| 63 | trametinib                                            | S             | Adult      | No            | April 2019    | Fully innovative         | Important  | Important   | High                |                    |
| 64 | doravirina/<br>lamivudina/<br>tenofovir<br>disoproxil | Non-Onco      | Adult      | No            | May 2019      | Not innovative           | Poor       | Poor        | Moderate            |                    |
| 65 | doravirine                                            | Non-Onco      | Adult      | No            | May 2019      | Not innovative           | Poor       | Poor        | Moderate            |                    |
| 66 | venetoclax                                            | H             | Adult      | Yes           | April 2019    | Conditionally innovative | Moderate   | Moderate    | Moderate            |                    |
| 67 | abemaciclib                                           | S             | Adult      | No            | May 2019      | Conditionally innovative | Moderate   | Moderate    | Moderate            |                    |
| 68 | caplacizumab                                          | Non-Onco      | Adult      | Yes           | February 2019 | Conditionally innovative | Moderate   | Moderate    | Low                 |                    |
| 69 | patisiran                                             | Non-Onco      | Adult      | Yes           | November 2018 | Fully innovative         | Important  | Important   | Moderate            |                    |
| 70 | emicizumab                                            | Non-Onco      | Mixed      | Yes           | October 2019  | Conditionally innovative | Moderate   | Moderate    | Low                 |                    |
| 71 | metreleptin                                           | Non-Onco      | Mixed      | Yes           | February 2019 | Conditionally innovative | Maximum    | Moderate    | Very low            | Ultra-rare disease |
| 72 | abiraterone acetate                                   | S             | Adult      | No            | May 2018      | Not innovative           | Moderate   | Poor        | Moderate            |                    |
| 73 | alirocumab                                            | Non-Onco      | Adult      | No            | November 2019 | Not innovative           | Moderate   | Poor        | Moderate            |                    |

| ID | Medicine         | Disease Group | Population | Rare disease* | CTS date      | Innovation status | Unmet need | Added value | Quality of evidence | Notes              |
|----|------------------|---------------|------------|---------------|---------------|-------------------|------------|-------------|---------------------|--------------------|
| 74 | encorafenib      | S             | Adult      | No            | May 2019      | Not innovative    | Moderate   | Poor        | Moderate            |                    |
| 75 | binimetinib      | S             | Adult      | No            | May 2019      | Not innovative    | Moderate   | Poor        | Moderate            |                    |
| 76 | lanadelumab      | Non-Onco      | Mixed      | Yes           | December 2019 | Not innovative    | Moderate   | Poor        | Moderate            |                    |
| 77 | cerliponase alfa | Non-Onco      | Pediatric  | Yes           | December 2018 | Fully innovative  | Maximum    | Important   | Very low            | Ultra-rare disease |

\* according to orphanet

AIFA: italian medicines agency; CTS: technical-scientific committee; H: hematological malignancies; S: solid tumor; onco: oncological disease; non-onco: non oncological disease
