# Supplementary material for: Key drivers of innovativeness appraisal for medicines: the Italian experience after the adoption of the new ranking system
Source: PubMed Central journal article supplement — BMJ Open. 2021 Jan 13;11(1):e041259. doi: 10.1136/bmjopen-2020-041259 (PMC7812109; doi:10.1136/bmjopen-2020-041259), 2021-01-13

Supplementary Figure 1. Deterministic decision tree based on the available innovativeness appraisals released by the Italian Medicines Agency (2017-2020)

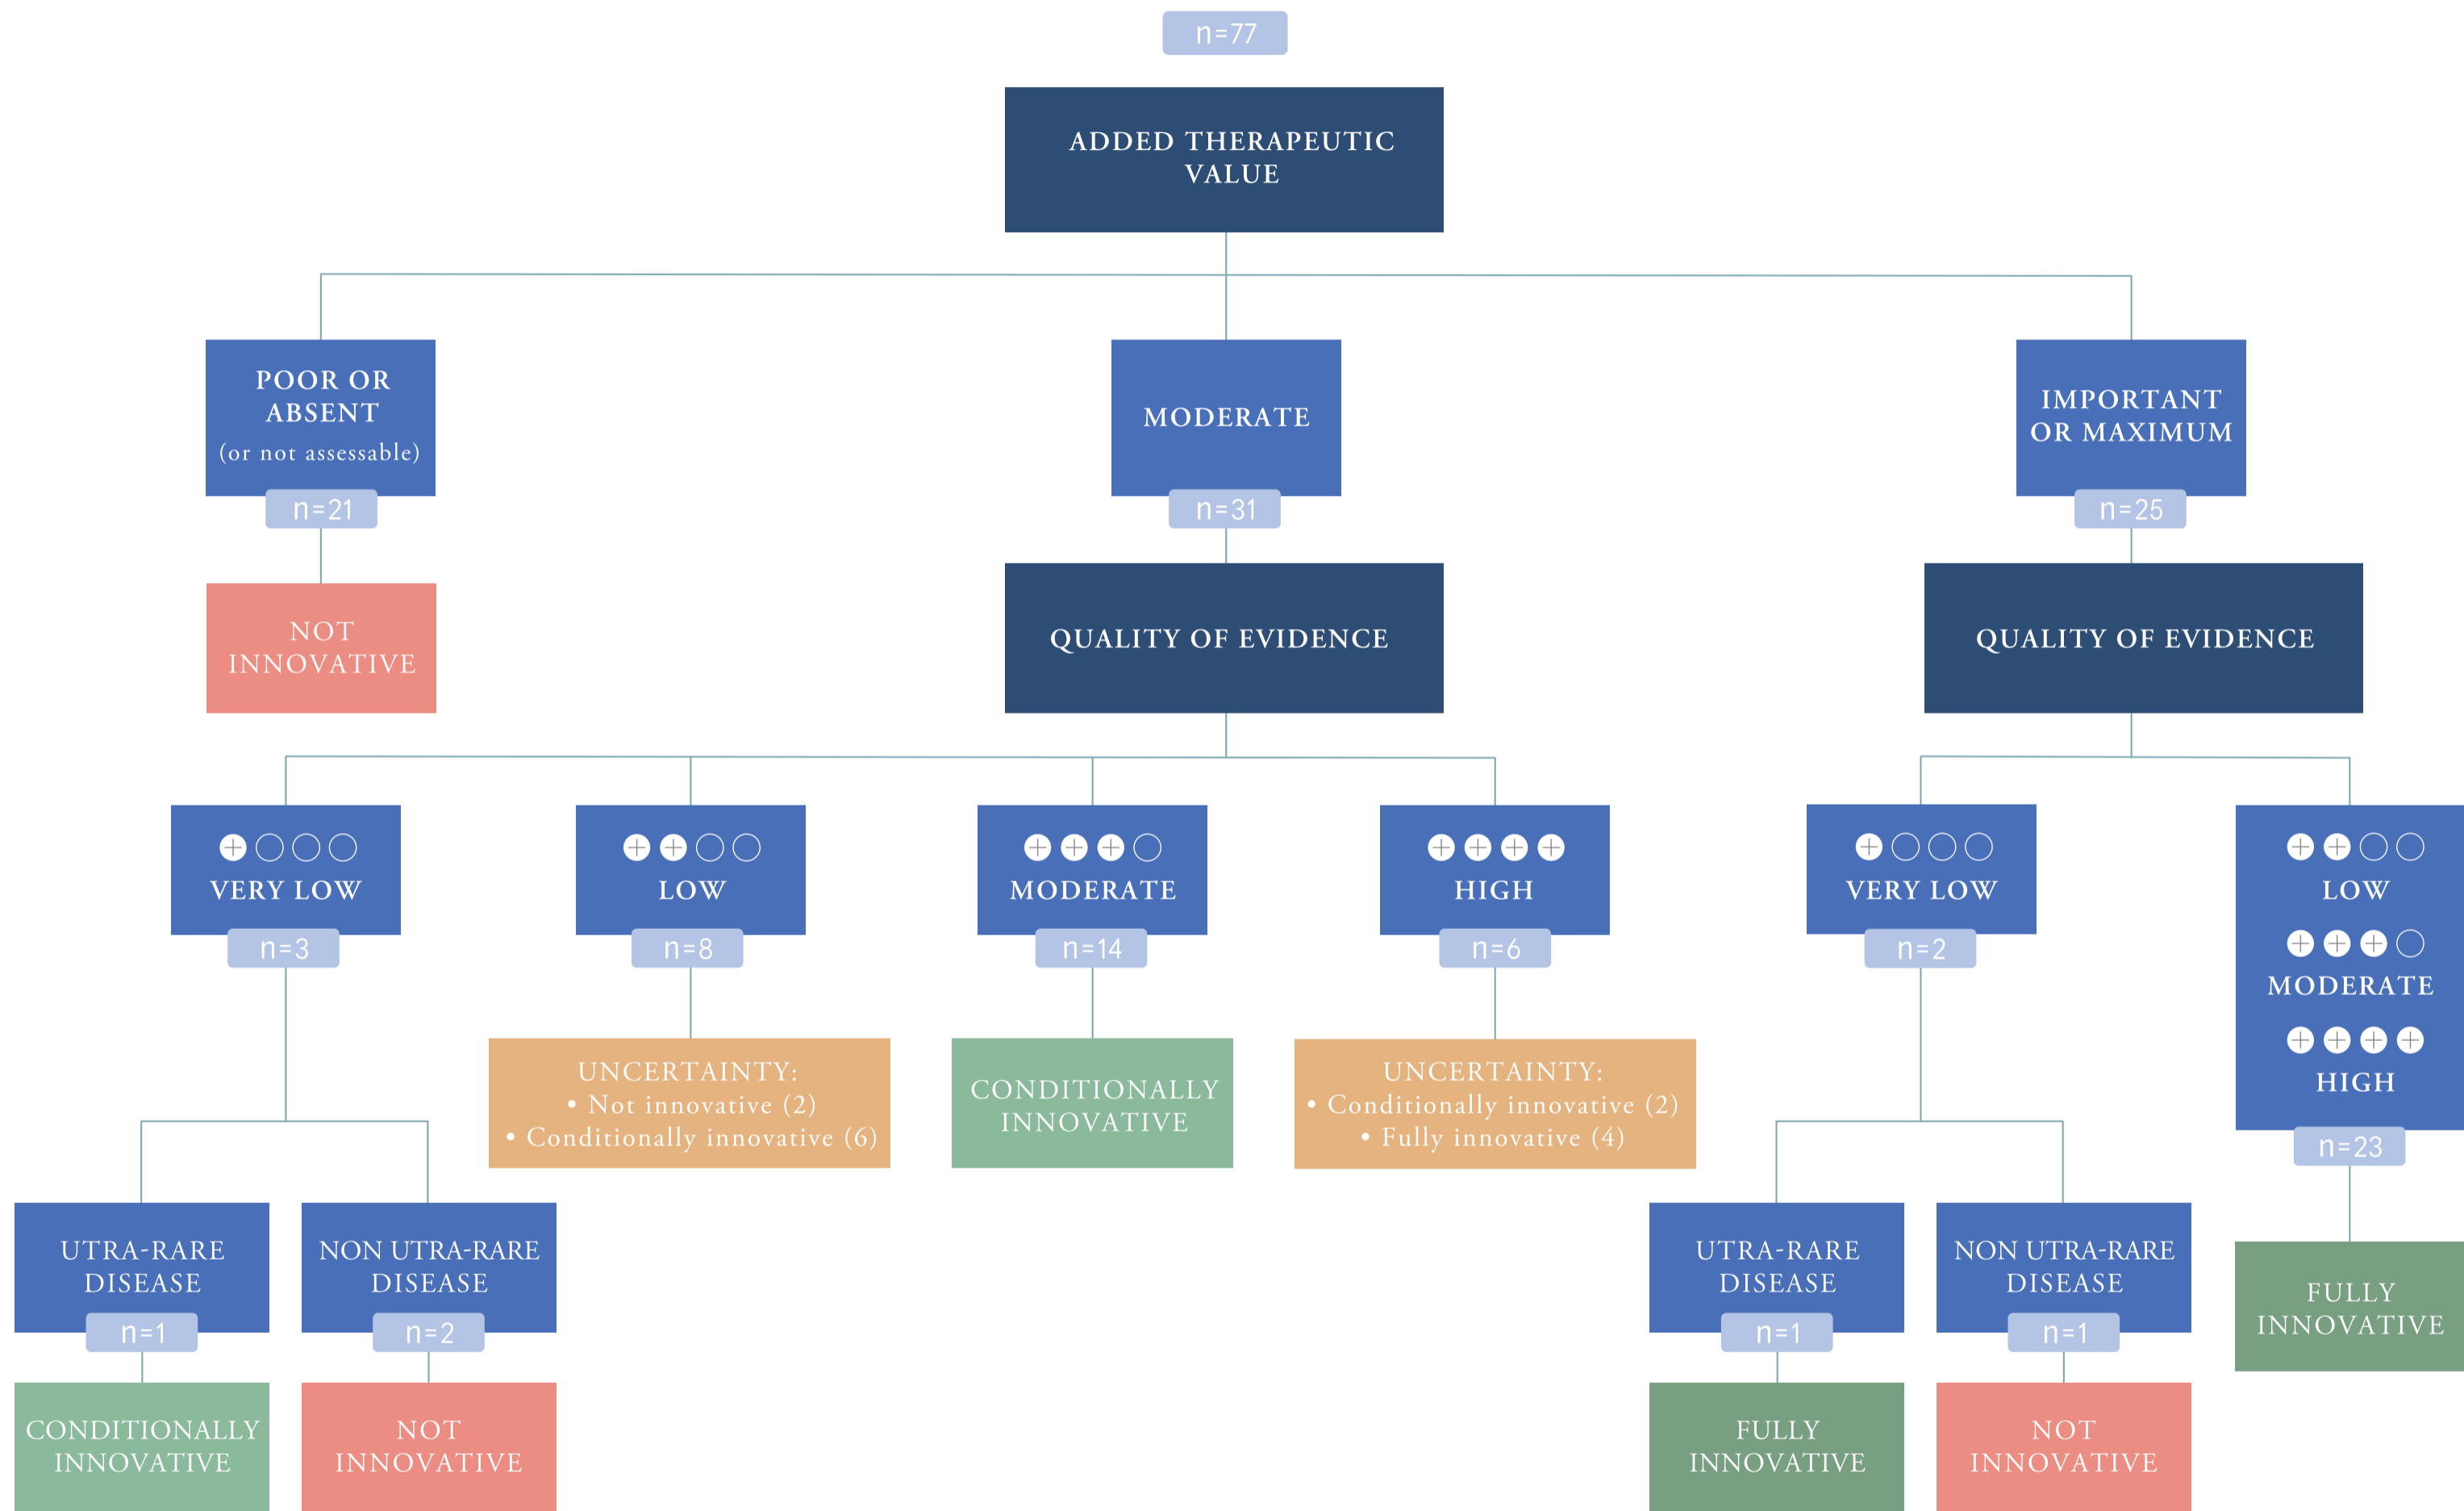

Supplement: bmjopen-2020-041259supp002.pdf [file bmjopen-2020-041259supp002.pdf]
